# Supplementary material for: Au nanocluster arrays on self-assembled block copolymer thin films as highly active SERS substrates with excellent reproducibility
Source: Royal Society of Chemistry journal article supplement (doi:10.1039/c6ra05225h), 2016-01-01
Supplement: c6ra05225h1.pdf [file c6ra05225h1.pdf]

Supporting Information for:

**Au Nanocluster Arrays on Self-assembled Block Copolymer  
Thin Films as Highly Active SERS Substrates with Excellent  
Re-productibility**

Yale Shen,<sup>a</sup> YuanjunLiu,<sup>a,\*</sup> WeiWang,<sup>b</sup> Fan Xu,<sup>b</sup> Chao Yan,<sup>b</sup> JunhaoZhang,<sup>a</sup> Jing  
Wang,<sup>a</sup> AihuaYuan<sup>a,\*</sup>

<sup>a</sup>*School of Environmental and Chemical Engineering, Jiangsu University of Science  
and Technology, Zhenjiang 212003, P. R. China. Email: [liyuanjun@just.edu.cn](mailto:liyuanjun@just.edu.cn);  
[aihua.yuan@just.edu.cn](mailto:aihua.yuan@just.edu.cn); Tel: +86 0511-85639001*

<sup>b</sup>*School of Material Science and Engineering, Jiangsu University of Science and  
Technology, Zhenjiang 212003, P. R. China.*

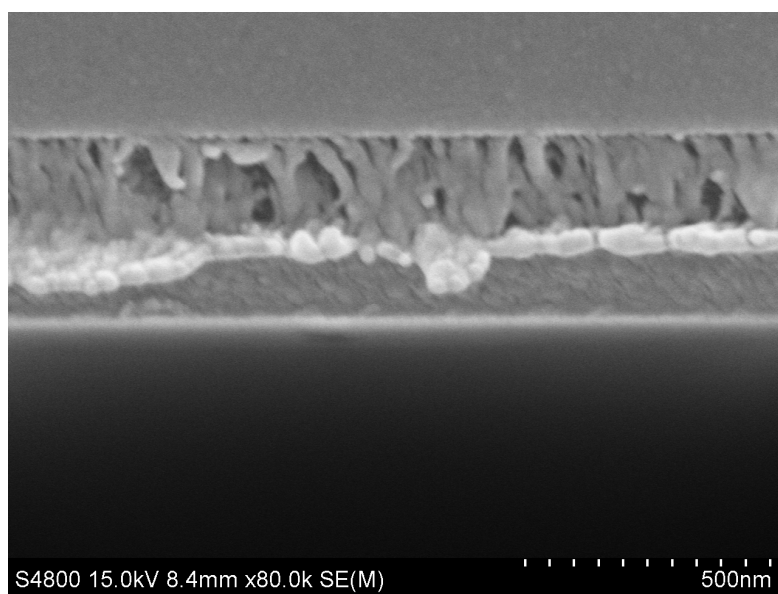

**Fig. SI-1** The cross-sectional SEM image of the as-annealed PS-*b*-P4VP thin film.

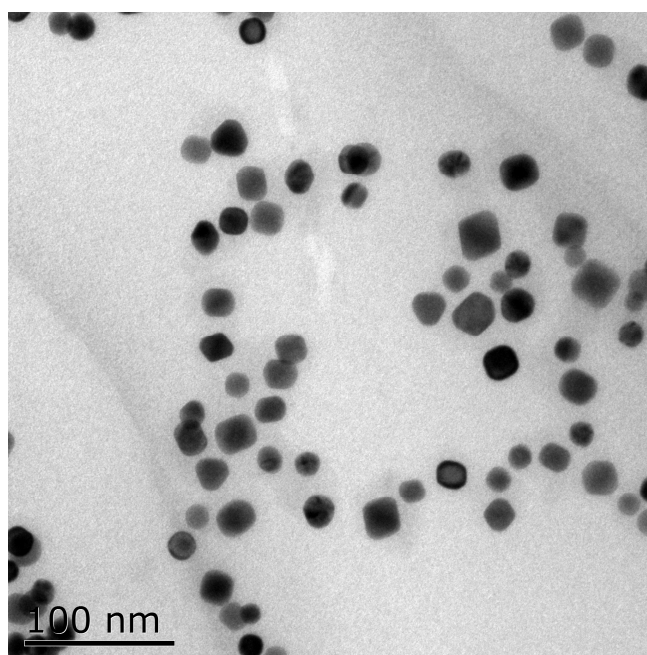

**Fig. SI-2** TEM image of Au nanoparticle film prepared by heating the cluster-like array film (shown in Figure 1) at 200 °C in N<sub>2</sub> atmosphere for 30 min.

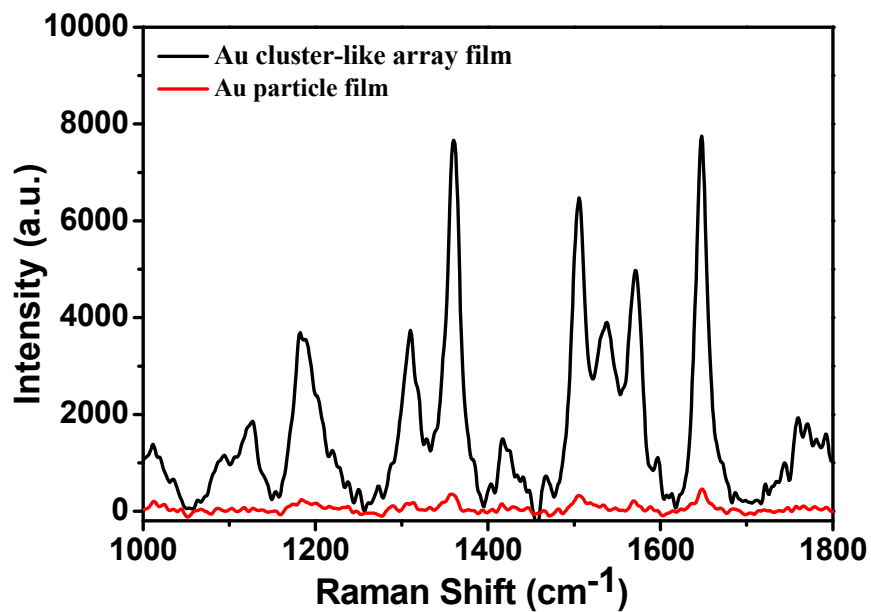

**Fig.SI-3** SERS spectra of  $10^{-5}$  M R6G methanol solution collected by the Au cluster-like array film (shown in Figure 1) and Au nanoparticle film prepared by heating the corresponding cluster-like array film at 200 °C in N<sub>2</sub> atmosphere for 30 min.

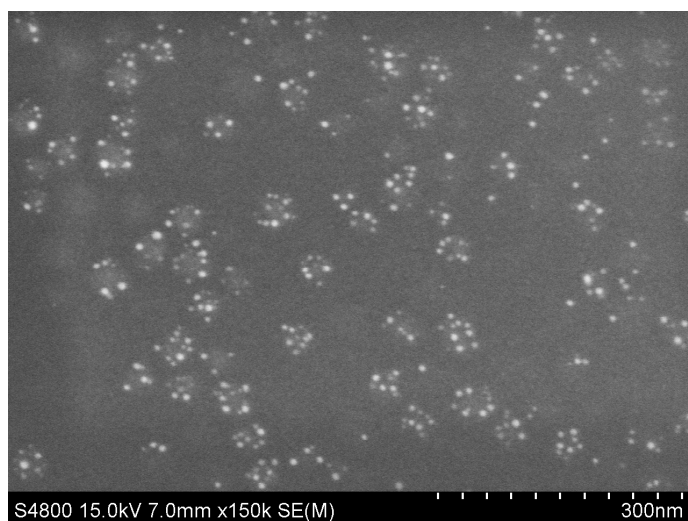

**Fig.SI-4** SEM image of Au nanoparticle clusters prepared with PS-b-P4VP spherical micelle template.

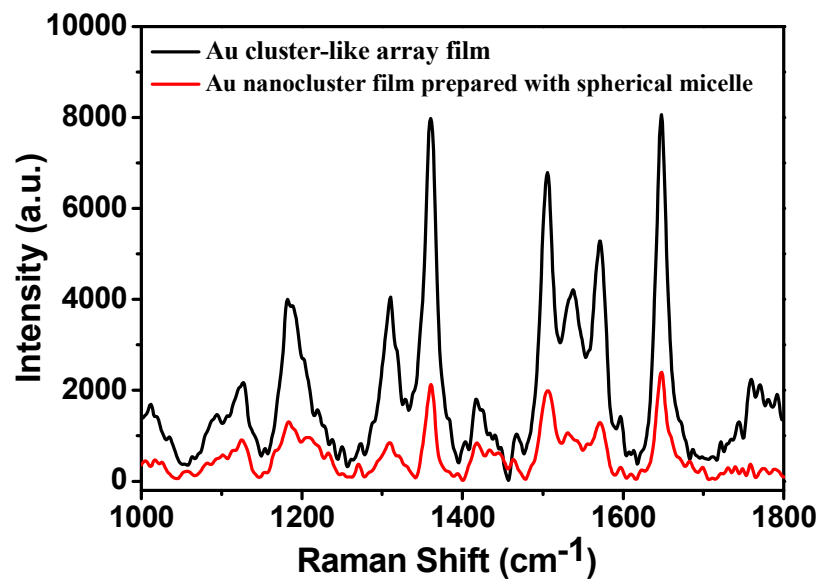

**Fig.SI-5** SERS spectra of  $10^{-5}$  M R6G methanol solution collected by the Au cluster-like array film (shown in Figure 1) and Au nanocluster film prepared with spherical micelle template.
